# Supplementary material for: Sex Representation Among United States Residency Programs from 2011-2021
Source: Research Square preprint supplement (doi:10.21203/rs.3.rs-6946326/v1), 2025-07-22
Supplement: Supplementary file 1 [file 00ff366a8ca233d7fef38ddf.docx]

Sex Representation Among United States Residency Programs from 2011-2021

*Advances in Health Sciences Education*

Lauren Hucko MD, MPH, Sophia Allison, BA, Hasenin Al-khersan, MD, Johanny Lopez Dominguez, MD, Kara M. Cavuoto, MD, Jayanth Sridhar, MD (Olive View Medical Center, University of California Los Angeles, jsridhar119@gmail.com)

| Specialty | | 2011 | 2012 | 2013 | 2014 | 2015 | 2016 | 2017 | 2018 | 2019 | 2020 | 2021 |
| --- | --- | --- | --- | --- | --- | --- | --- | --- | --- | --- | --- | --- |
| Total Residents | *Proportion Female, n (%)* | 40535/86257  (47.0) | 41814/89418 (46.8) | 42870/92105 (46.5) | 43711/94344 (46.3) | 44827/97069 (46.2) | 46478/101467 (45.8) | 48242/105849 (45.6) | 49910/109797 (45.5) | 53255/116061 (45.9) | 54980/118399  (46.4) | 58121/122787 (47.4) |
| *RQ* | 0.93 | 0.92 | 0.92 | 0.91 | 0.91 | 0.90 | 0.90 | 0.89 | 0.90 | 0.92 | 0.94 |
| Neurological Surgery | *Proportion Female, n (%)* | 178/1155 (15.4) | 196/1192 (16.4) | 205/1248 (16.4) | 224/1280 (17.5) | 225/1309 (17.2) | 239/1360 (17.6) | 248/1394 (17.8) | 253/1452 (17.4) | 293/1508 (19.4) | 318/1555 (20.5) | 344/1579 (21.8) |
| *RQ* | 0.30 | 0.32 | 0.32 | 0.34 | 0.34 | 0.35 | 0.35 | 0.34 | 0.38 | 0.40 | 0.43 |
| OBGYN | *Proportion Female, n (%)* | 4023/4909 (82.0) | 4035/4901 (82.3) | 4091/4961 (82.5) | 4153/5034 (82.5) | 4247/5111 (83.1) | 4386/5295 (82.8) | 4452/5367 (83.0) | 4559/5457 (83.5) | 4742/5651 (83.9) | 4878/5734 (85.1) | 5054/5851 (86.3) |
| *RQ* | 1.61 | 1.62 | 1.62 | 1.62 | 1.64 | 1.63 | 1.63 | 1.64 | 1.65 | 1.68 | 1.71 |
| Ophthalmology | *Proportion Female, n (%)* | 589/1389 (42.4) | 601/1372 (43.8) | 617/1378 (44.8) | 609/1387 (43.9) | 604/1424 (42.4) | 593/1439 (41.2) | 592/1470 (40.3) | 575/1466 (39.2) | 614/1511 (40.6) | 621/1529 (40.6) | 707/1690 (41.8) |
| *RQ* | 0.83 | 0.86 | 0.88 | 0.86 | 0.83 | 0.81 | 0.79 | 0.77 | 0.80 | 0.80 | 0.83 |
| Orthopedic Surgery | *Proportion Female, n (%)* | 448/3281 (13.7) | 471/3367 (14.0) | 466/3430 (13.6) | 496/3486 (14.2) | 517/3575 (14.5) | 525/3640 (14.4) | 579/3825 (15.1) | 606/3998 (15.2) | 606/3998 (15.2) | 738/4401 (16.8) | 816/4462 (18.3%) |
| *RQ* | 0.27 | 0.28 | 0.27 | 0.28 | 0.28 | 0.28 | 0.30 | 0.30 | 0.32 | 0.33 | 0.36 |
| Otolaryngology | *Proportion Female, n (%)* | 486/1421 (34.2) | 494/1427 (34.6) | 495/1442 (34.3) | 513/1460 (35.1) | 539/1479 (36.4) | 533/1518 (35.1) | 564/1568 (36.0) | 589/1630 (36.1) | 589/1630 (36.1) | 643/1718 (37.4) | 701/1762 (39.8) |
| *RQ* | 0.67 | 0.68 | 0.68 | 0.69 | 0.72 | 0.69 | 0.71 | 0.71 | 0.74 | 0.74 | 0.79 |
| Plastic Surgery | *Proportion Female, n (%)* | 86/338 (25.4) | 83/336 (24.7) | 97/395 (24.6) | 98/391 (25.1) | 96/363 (26.4) | 94/316 (29.7) | 77/266 (28.9) | 76/242 (31.4) | 76/242 (31.4) | 63/214 (29.4) | 63/202 (31.2) |
| *RQ* | 0.50 | 0.49 | 0.48 | 0.49 | 0.52 | 0.59 | 0.57 | 0.62 | 0.62 | 0.58 | 0.62 |
| Plastic Surgery- Integrated | *Proportion Female, n (%)* | 116/359 (32.3) | 163/414 (39.4) | 187/480 (39.0) | 216/548 (39.4) | 265/639 (41.5) | 303/726 (41.7) | 342/812 (42.1) | 366/884 (41.4) | 366/884 (41.4) | 434/1005 (43.2) | 489/1060 (46.1) |
| *RQ* | 0.64 | 0.78 | 0.77 | 0.78 | 0.82 | 0.82 | 0.83 | 0.82 | 0.83 | 0.86 | 0.91 |
| General Surgery | *Proportion Female, n (%)* | 2484/6976 (35.6) | 2565/7049 (36.4) | 2696/7296 (37.0) | 2796/7393 (37.8) | 2825/7521 (37.6) | 2989/7868 (38.0) | 3211/8156 (39.4) | 3443/8548 (40.3) | 3443/8548 (40.3) | 3977/9007 (44.2) | 4204/9284 (45.3) |
| *RQ* | 0.70 | 0.72 | 0.73 | 0.74 | 0.74 | 0.75 | 0.77 | 0.79 | 0.83 | 0.87 | 0.90 |
| Thoracic Surgery-Integrated | *Proportion Female, n (%)* | 9/40 (22.5) | 14/59 (23.7) | 20/81 (24.7) | 25/115 (21.7) | 33/136 (24.3) | 42/158 (26.6) | 48/179 (26.8) | 55/187 (29.4) | 55/187 (29.4) | 61/203 (30.0) | 76/230 (33.0) |
| *RQ* | 0.44 | 0.47 | 0.49 | 0.43 | 0.48 | 0.52 | 0.53 | 0.58 | 0.55 | 0.60 | 0.65 |
| Urology | *Proportion Female, n (%)* | 253/1090 (23.2) | 259/1106 (23.4) | 251/1125 (22.3) | 260/1163 (22.4) | 309/1242 (24.9) | 325/1268 (25.6) | 318/1298 (24.5) | 333/1331 (25.0) | 333/1331 (25.0) | 504/1764 (28.6) | 545/1793 (30.4) |
| *RQ* | 0.46 | 0.46 | 0.44 | 0.44 | 0.49 | 0.50 | 0.48 | 0.49 | 0.54 | 0.57 | 0.60 |
| Vascular Surgery- Integrated | *Proportion Female, n (%)* | 38/92 (41.3) | 51/130 (39.2) | 61/167 (36.5) | 76/204 (37.3) | 93/231 (40.3) | 94/257 (36.6) | 94/268 (35.1) | 96/290 (33.1) | 96/290 (33.1) | 116/331 (35.0) | 132/361 (36.6) |
| *RQ* | 0.81 | 0.77 | 0.72 | 0.73 | 0.79 | 0.72 | 0.69 | 0.65 | 0.68 | 0.69 | 0.72 |
| Total Surgical Residents | *Proportion Female, n (%)* | 8710/21050 (41.4) | 8932/21353 (41.8) | 9186/22003 (41.7) | 9466/22461 (42.1) | 9753/23030 (42.3) | 10123/23845 (42.5) | 10525/24603 (42.8) | 10951/25485 (43.0) | 10951/25485 (43.0) | 12353/27461 (45.0) | 13131/28274 (46.44) |
| *RQ* | 0.81 | 0.82 | 0.82 | 0.83 | 0.83 | 0.84 | 0.84 | 0.85 | 0.86 | 0.89 | 0.92 |
| Anesthesiology | *Proportion Female, n (%)* | 2018/5524 (36.5) | 1993/5639 (35.3) | 2080/5735 (36.3) | 2096/5831 (35.9) | 2140/5984 (35.8) | 2145/6119 (35.1) | 2119/6220 (34.1) | 2148/6343 (33.9) | 2199/6632 (33.2) | 2264/6865 (33.0) | 2398/7076 (33.9) |
| *RQ* | 0.72 | 0.70 | 0.71 | 0.71 | 0.70 | 0.69 | 0.67 | 0.67 | 0.65 | 0.65 | 0.67 |
| Dermatology | *Proportion Female, n (%)* | 776/1211 (64.1) | 776/1211 (64.1) | 786/1240 (63.4) | 799/1260 (63.4) | 840/1318 (63.7) | 906/1420 (63.8) | 957/1512 (63.3) | 937/1550 (60.5) | 939/1589 (59.1) | 944/1607 (58.7) | 976/1609 (60.7) |
| *RQ* | 1.26 | 1.26 | 1.25 | 1.25 | 1.25 | 1.26 | 1.25 | 1.19 | 1.16 | 1.16 | 1.2 |
| Emergency Medicine | *Proportion Female, n (%)* | 1971/4988 (39.5) | 2053/5328 (38.5) | 2077/5536 (37.5) | 2118/5776 (36.7) | 2222/6093 (36.5) | 2358/6756 (34.9) | 2593/7306 (35.5) | 2770/7785 (35.6) | 2988/8240 (36.3) | 3188/8588 (37.1) | 3560/9033 (39.4) |
| *RQ* | 0.78 | 0.76 | 0.74 | 0.72 | 0.72 | 0.69 | 0.70 | 0.70 | 0.71 | 0.74 | 0.78 |
| Family Medicine | *Proportion Female, n (%)* | 5267/9597 (54.9) | 5480/9894 (55.4) | 5616/10141 (55.4) | 5722/10324 (55.4) | 5837/10630 (54.9) | 6111/11137 (54.9) | 6505/12044 (54.0) | 6964/12983 (53.6) | 7341/13673 (53.7) | 7558/14047 (53.8) | 7983/14625 (54.6) |
| *RQ* | 1.08 | 1.09 | 1.09 | 1.09 | 1.08 | 1.08 | 1.06 | 1.06 | 1.06 | 1.07 | 1.08 |
| Internal Medicine | *Proportion Female, n (%)* | 8609/19322 (44.6) | 9085/20888 (43.5) | 9442/21756 (43.4) | 9795/22796 (43.0) | 10163/23554 (43.1) | 10505/24645 (42.6) | 11042/26021 (42.4) | 11315/26812 (42.2) | 12297/28625 (43.0) | 12749/29394 (43.4) | 13565/30760 (44.1) |
| *RQ* | 0.88 | 0.86 | 0.85 | 0.85 | 0.85 | 0.84 | 0.84 | 0.83 | 0.85 | 0.86 | 0.87 |
| Medical Genetics | *Proportion Female, n (%)* | 44/73 (60.3) | 50/79 (63.3) | 53/79 (67.1) | 54/74 (73.0) | 53/73 (72.6) | 48/71 (67.6) | 47/70 (67.1) | 46/69 (66.7) | 33/60 (55.0) | 38/66 (57.6) | 43/72 (59.7) |
| *RQ* | 1.19 | 1.25 | 1.32 | 1.44 | 1.43 | 1.33 | 1.32 | 1.31 | 1.08 | 1.14 | 1.18 |
| Combined Medicine and Pediatrics | *Proportion Female, n (%)* | 759/1298 (58.5) | 797/1362 (58.5) | 823/1390 (59.2) | 815/1394 (58.5) | 824/1406 (58.6) | 837/1435 (58.3) | 832/1438 (57.9) | 862/1459 (59.1) | 883/1500 (58.9) | 914/1507 (60.7) | 936/1527 (61.3) |
| *RQ* | 1.15 | 1.15 | 1.17 | 1.15 | 1.15 | 1.15 | 1.14 | 1.16 | 1.16 | 1.20 | 1.21 |
| Neurology | *Proportion Female, n (%)* | 858/1875 (45.8) | 884/1924 (45.9) | 895/2030 (44.1) | 976/2164 (45.1) | 1007/2263 (44.5) | 1294/2778 (46.6) | 1425/2994 (47.6) | 1506/3136 (48.0) | 1649/3416 (48.3) | 1497/3183 (47.0) | 1607/3365 (47.8) |
| *RQ* | 0.90 | 0.90 | 0.87 | 0.89 | 0.88 | 0.92 | 0.94 | 0.95 | 0.95 | 0.93 | 0.95 |
| Nuclear Medicine | *Proportion Female, n (%)* | 48/133 (36.1) | 38/116 (32.8) | 37/106 (34.9) | 38/92 (41.3) | 30/84 (35.7) | 25/74 (33.8) | 27/71 (38.0) | 28/74 (37.8) | 32/78 (41.0) | 23/66 (34.8) | 16/73 (21.9) |
| *RQ* | 0.71 | 0.64 | 0.69 | 0.81 | 0.70 | 0.67 | 0.75 | 0.74 | 0.81 | 0.69 | 0.43 |
| Pathology | *Proportion Female, n (%)* | 1253/2302 (54.4) | 1258/2282 (55.1) | 1243/2282 (54.5) | 1212/2289 (52.9) | 1163/2284 (50.9) | 1151/2302 (50.0) | 1160/2303 (50.4) | 1149/2296 (50.0) | 1196/2323 (51.5) | 1184/2308 (51.3) | 1204/2333 (51.6) |
| *RQ* | 1.07 | 1.09 | 1.07 | 1.04 | 1.00 | 0.98 | 0.99 | 0.99 | 1.01 | 1.02 | 1.02 |
| Pediatrics | *Proportion Female, n (%)* | 5581/7598 (73.5) | 5802/7910 (73.4) | 5951/8156 (73.0) | 5871/8054 (72.9) | 5959/8180 (72.8) | 6039/8300 (72.8) | 5963/8281 (72.0) | 6002/8345 (71.9) | 6481/8978 (72.2) | 6698/9238 (72.5) | 6894/9449 (72.96) |
| *RQ* | 1.45 | 1.44 | 1.44 | 1.43 | 1.43 | 1.43 | 1.42 | 1.42 | 1.42 | 1.44 | 1.45 |
| PM&R | *Proportion Female, n (%)* | 476/1231 (38.7) | 470/1224 (38.4) | 481/1244 (38.7) | 497/1263 (39.4) | 504/1289 (39.1) | 521/1318 (39.5) | 534/1345 (39.7) | 520/1387 (37.5) | 519/1450 (35.8) | 525/1506 (34.9) | 535/1575 (34.0) |
| *RQ* | 0.76 | 0.76 | 0.76 | 0.77 | 0.77 | 0.78 | 0.78 | 0.74 | 0.70 | 0.69 | 0.67 |
| Preventative Medicine | *Proportion Female, n (%)* | 157/315 (49.8) | 166/335 (49.6) | 152/319 (47.6) | 149/330 (45.2) | 162/355 (45.6) | 159/352 (45.2) | 156/347 (45.0) | 157/348 (45.1) | 166/346 (48.0) | 166/348 (47.7) | 174/346 (50.2) |
| *RQ* | 0.98 | 0.98 | 0.94 | 0.89 | 0.90 | 0.89 | 0.88 | 0.89 | 0.94 | 0.94 | 1.00 |
| Psychiatry | *Proportion Female, n (%)* | 2531/4602 (55.0) | 2546/4683 (54.4) | 2591/4812 (53.8) | 2646/4891 (54.1) | 2705/5090 (53.1) | 2790/5413 (51.5) | 2889/5737 (50.4) | 3043/6066 (50.2) | 3236/6576 (49.2) | 3428/6900 (49.7) | 3688/7343 (50.2) |
| *RQ* | 1.08 | 1.07 | 1.06 | 1.06 | 1.05 | 1.01 | 0.99 | 0.99 | 0.97 | 0.98 | 0.99 |
| Radiation Oncology | *Proportion Female, n (%)* | 218/665 (32.8) | 210/671 (31.3) | 204/699 (29.2) | 202/714 (28.3) | 209/724 (28.9) | 224/745 (30.1) | 222/758 (29.3) | 232/764 (30.4) | 231/768 (30.1) | 236/773 (30.5) | 249/763 (32.6) |
| *RQ* | 0.65 | 0.62 | 0.57 | 0.56 | 0.57 | 0.59 | 0.58 | 0.60 | 0.59 | 0.60 | 0.65 |
| Radiology- Diagnostics | *Proportion Female, n (%)* | 1271/4488 (28.3) | 1274/4519 (28.2) | 1253/4577 (27.4) | 1255/4621 (27.2) | 1256/4712 (26.7) | 1242/4757 (26.1) | 1246/4799 (26.0) | 1280/4895 (26.1) | 1284/4967 (25.9) | 1215/4542 (26.8) | 1253/4564 (27.5) |
| *RQ* | 0.56 | 0.55 | 0.54 | 0.53 | 0.52 | 0.51 | 0.51 | 0.51 | 0.51 | 0.53 | 0.54 |
| Total Nonsurgical Residents | *Proportion Female, n (%)* | 31825/65207 (48.8) | 32882/68065 (48.3) | 33684/70102 (48.0) | 34245/71873 (47.6) | 35074/74039 (47.4) | 36355/77622 (46.8) | 37717/81246 (46.4) | 38959/84312 (46.2) | 41474/89221 (46.5) | 42627/90938 (46.9) | 45081/94513 (47.7) |
| *RQ* | 0.96 | 0.95 | 0.95 | 0.94 | 0.93 | 0.92 | 0.91 | 0.91 | 0.92 | 0.93 | 0.94 |
