# Supplementary material for: Sex Representation Among United States Residency Programs from 2011-2021
Source: Research Square preprint supplement (doi:10.21203/rs.3.rs-6946326/v1), 2025-07-22
Supplement: Supplementary file 2 [file b8c1380410c0fb24eb833a6e.docx]

Sex Representation Among United States Residency Programs from 2011-2021

*Advances in Health Sciences Education*

Lauren Hucko MD, MPH, Sophia Allison, BA, Hasenin Al-khersan, MD, Johanny Lopez Dominguez, MD, Kara M. Cavuoto, MD, Jayanth Sridhar, MD (Olive View Medical Center, University of California Los Angeles, jsridhar119@gmail.com)

**Supplemental Table 2:** Female Residents by Specialty with Associated Mean RQ, 2011 to 2016 and 2017 to 2021

|  | **2011-2016** | | | **2017-2021** | | | RQ difference | *p* |
| --- | --- | --- | --- | --- | --- | --- | --- | --- |
|  | n | % | Mean RQ | n | % | Mean RQ |
| Neurological Surgery | 1,267 | 16.8% | 0.38 | 1,456 | 19.4% | 0.33 | -0.05 | < 0.0001 |
| OBGYN | 24,935 | 82.5% | 1.66 | 23,685 | 84.4% | 1.62 | -0.04 | < 0.0001 |
| Ophthalmology | 3,613 | 43.1% | 0.80 | 3,109 | 40.6% | 0.85 | 0.05 | 0.0013 |
| Orthopedic Surgery | 2,923 | 14.1% | 0.32 | 3,439 | 16.4% | 0.28 | -0.04 | < 0.0001 |
| Otolaryngology | 3,060 | 35.0% | 0.74 | 3,128 | 37.4% | 0.69 | -0.05 | 0.0009 |
| Plastics | 554 | 25.9% | 0.60 | 350 | 30.4% | 0.51 | -0.09 | 0.0055 |
| Plastics-Integrated | 1,250 | 39.5% | 0.85 | 2,034 | 43.1% | 0.77 | -0.08 | 0.0012 |
| Surgery | 16,355 | 37.1% | 0.83 | 18,531 | 42.4% | 0.73 | -0.10 | < 0.0001 |
| Vasc Surg-Integrated | 413 | 38.2% | 0.69 | 544 | 34.9% | 0.76 | 0.07 | 0.0811 |
| Thoracic Surg-Integrated | 143 | 24.3% | 0.58 | 294 | 29.6% | 0.47 | -0.11 | 0.0213 |
| Urology | 1,657 | 23.7% | 0.54 | 2,171 | 27.4% | 0.47 | -0.07 | < 0.0001 |
| Anesthesiology | 12,472 | 35.8% | 0.66 | 11,128 | 33.6% | 0.71 | 0.04 | < 0.0001 |
| Dermatology | 4,871 | 63.7% | 1.19 | 4,753 | 60.4% | 1.25 | 0.06 | < 0.0001 |
| Emergency Medicine | 12,799 | 37.1% | 0.73 | 15,099 | 36.9% | 0.73 | 0.01 | 0.4786 |
| Family Medicine | 34,033 | 55.1% | 1.06 | 36,351 | 54.0% | 1.09 | 0.02 | < 0.0001 |
| Internal Medicine | 57,599 | 43.3% | 0.85 | 60,968 | 43.1% | 0.85 | 0.01 | 0.1535 |
| Medical Genetics | 302 | 67.3% | 1.21 | 207 | 61.4% | 1.33 | 0.12 | 0.0901 |
| Neurology | 5,914 | 45.4% | 0.94 | 7,684 | 47.7% | 0.89 | -0.05 | 0.0001 |
| Nuclear Medicine | 216 | 35.7% | 0.68 | 126 | 34.8% | 0.70 | 0.02 | 0.9346 |
| Pathology | 7,280 | 53.0% | 1.01 | 5,893 | 51.0% | 1.04 | 0.04 | 0.0014 |
| Pediatrics | 35,203 | 73.0% | 1.43 | 3,2038 | 72.3% | 1.44 | 0.01 | 0.0170 |
| PM&R | 2,949 | 39.0% | 0.72 | 2,633 | 36.3% | 0.77 | 0.05 | 0.0007 |
| Preventative Medicine | 945 | 47.1% | 0.93 | 819 | 47.2% | 0.93 | 0.00 | 0.9562 |
| Psychiatry | 15,809 | 53.6% | 0.98 | 16,284 | 49.9% | 1.06 | 0.07 | < 0.0001 |
| Radiation Oncology | 1,267 | 30.0% | 0.60 | 1,170 | 30.6% | 0.59 | -0.01 | 0.5987 |
| Radiology- Diagnostics | 7,551 | 27.3% | 0.52 | 6,278 | 26.4% | 0.54 | 0.02 | 0.0248 |
| Med/Peds | 4,855 | 58.6% | 1.17 | 4,427 | 59.6% | 1.15 | -0.02 | 0.2170 |
| Total Surgical | 56,170 | 42.0% | 0.88 | 58,741 | 44.3% | 0.83 | -0.04 | < 0.0001 |
| Total Nonsurgical | 204,065 | 47.8% | 0.93 | 205,858 | 46.8% | 0.95 | 0.02 | < 0.0001 |
| Total Residents | 260,235 | 46.4% | 0.91 | 264,599 | 46.2% | 0.92 | 0.01 | 0.0141 |

Supplemental Table 2 lists the total female residents and proportion of female residents (n, %) by specialty, total surgical specialties, total nonsurgical specialties, and by total residents from 2011 to 2016 and from 2017 to 2021 with associated mean RQ. This table also lists the difference in mean RQ across study periods with associated p-values from t-test analysis. P-values < 0.05 were considered statistically significant, and an asterisk indicates statistical significance.
